# Supplementary material for: Transcriptional orchestration of mitochondrial homeostasis in a cellular model of PGC-1-related coactivator-dependent thyroid tumor
Source: PubMed Central journal article supplement (PMC5882305; doi:10.18632/oncotarget.24633), 2018-03-23
Supplement: oncotarget-09-15883-s001.pdf [file oncotarget-09-15883-s001.pdf]

## Transcriptional orchestration of mitochondrial homeostasis in a cellular model of PGC-1-related coactivator-dependent thyroid tumor

### SUPPLEMENTARY MATERIALS

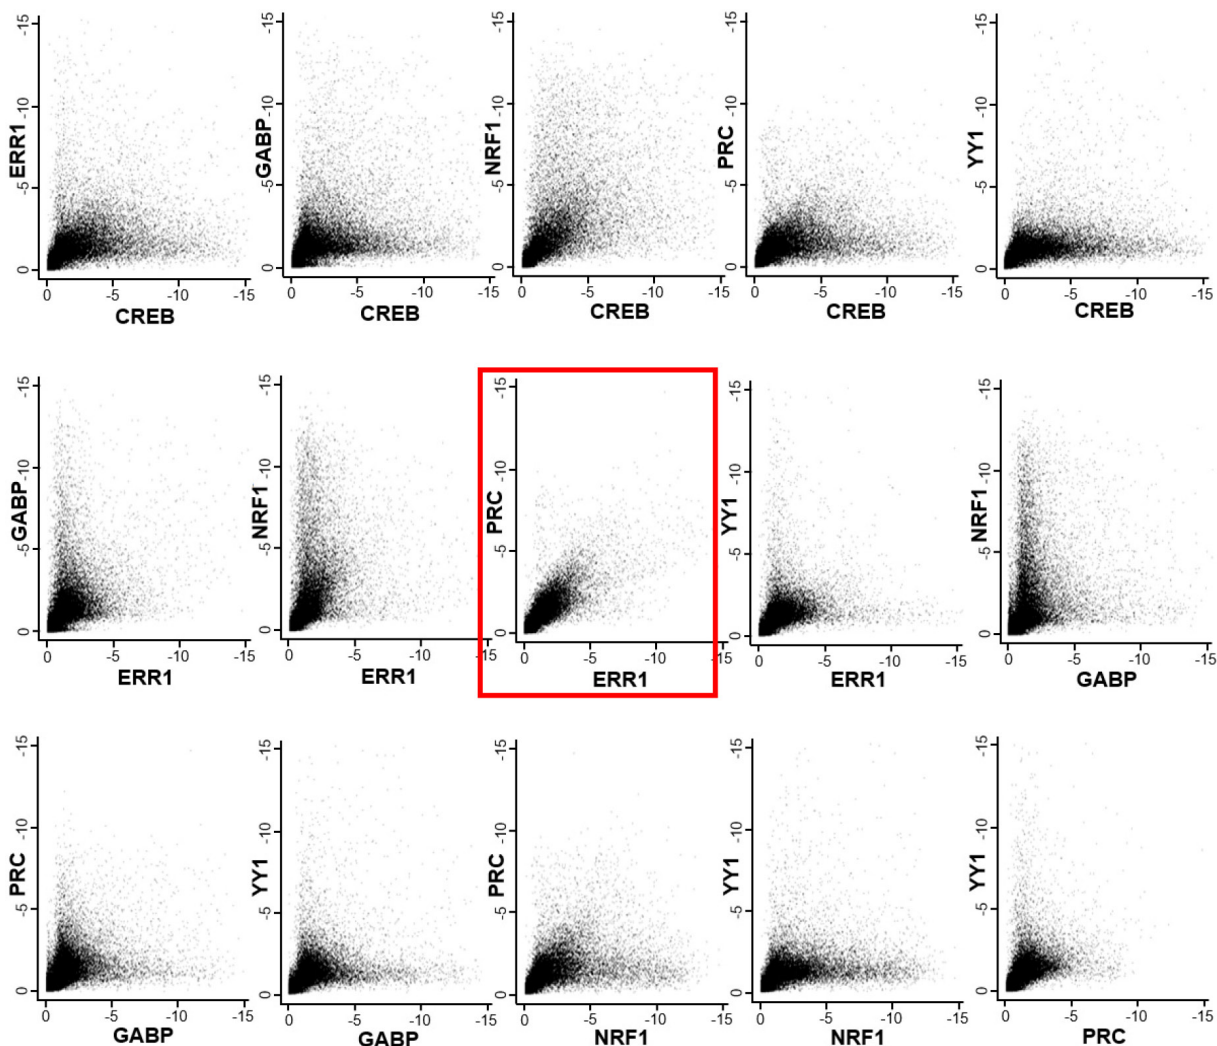

**Supplementary Figure 1: Correlation between the best probes from 48h ChIP-chip analyses issued from two different factors.** Each graph showed the correlation of the geometric mean (log base 10) for the best probe of each gene for two transcription factors. The red box corresponded to the correlation between ERR1 (ERRa) and PRC probes (Pearson correlation 0.82, p-value < 2.2 10<sup>-16</sup>).

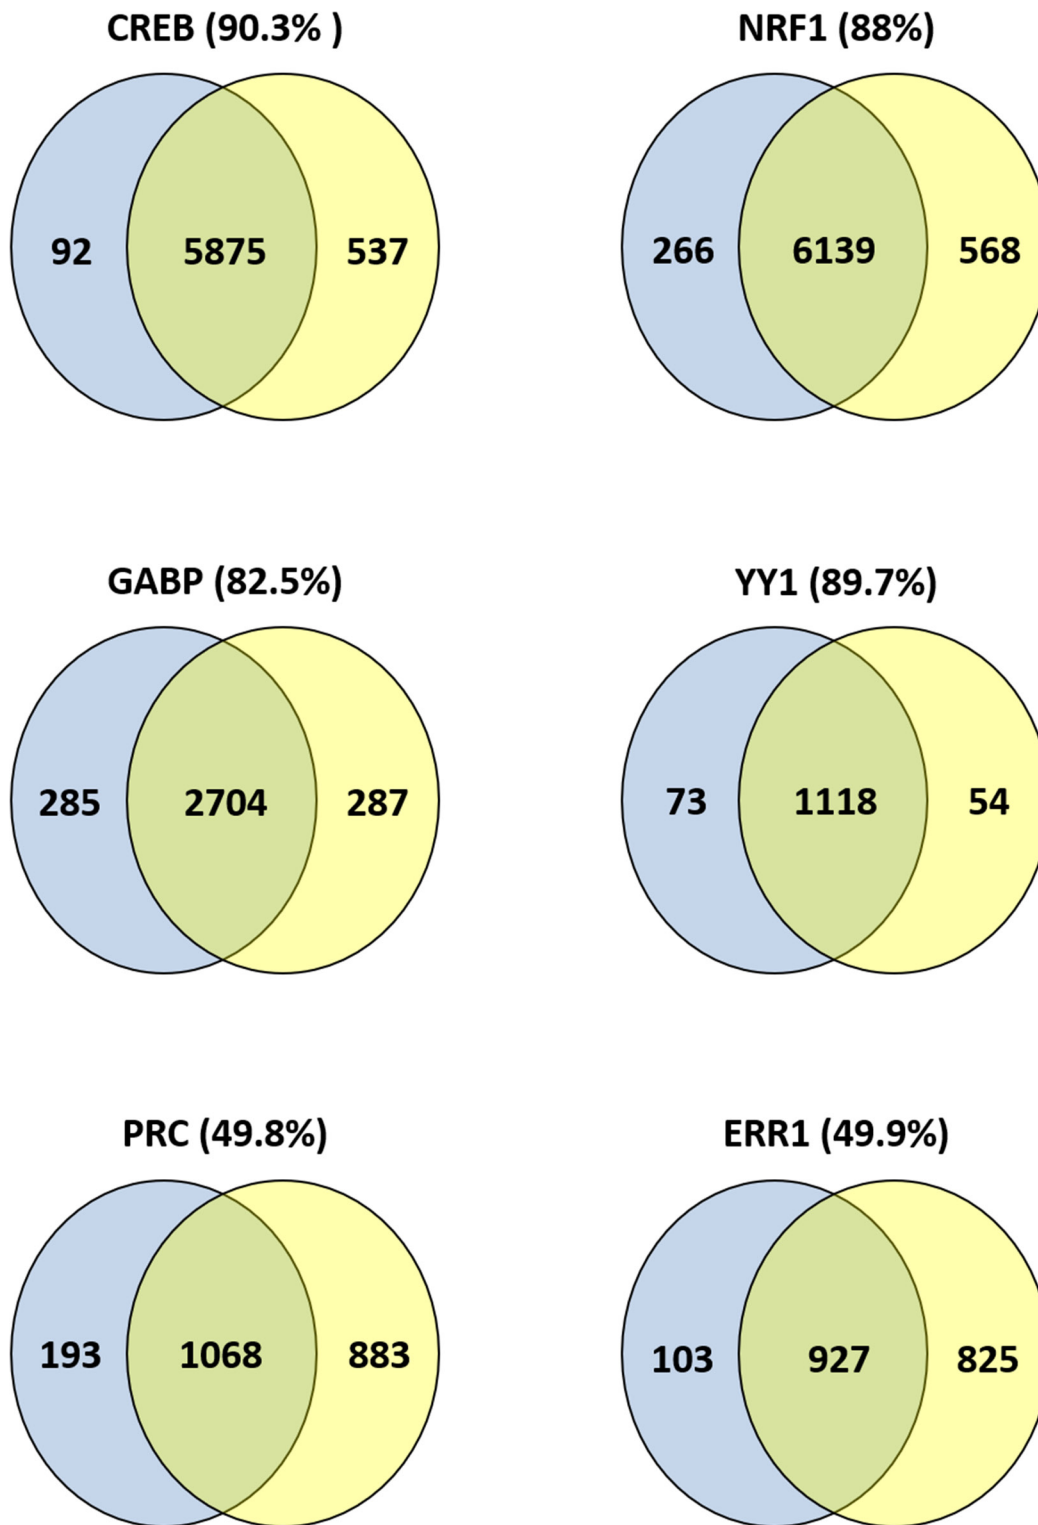

Supplementary Figure 2: Venn diagrams representing the number of positive genes on ChIP-chip analyses after 24h (blue) and 48h (yellow) of serum induction were shown for the six factors studied (CREB, NRF1, GABP, YY1, PRC and ERR1). The percentage of genes commonly positive at 24h and 48h are indicated in brackets.

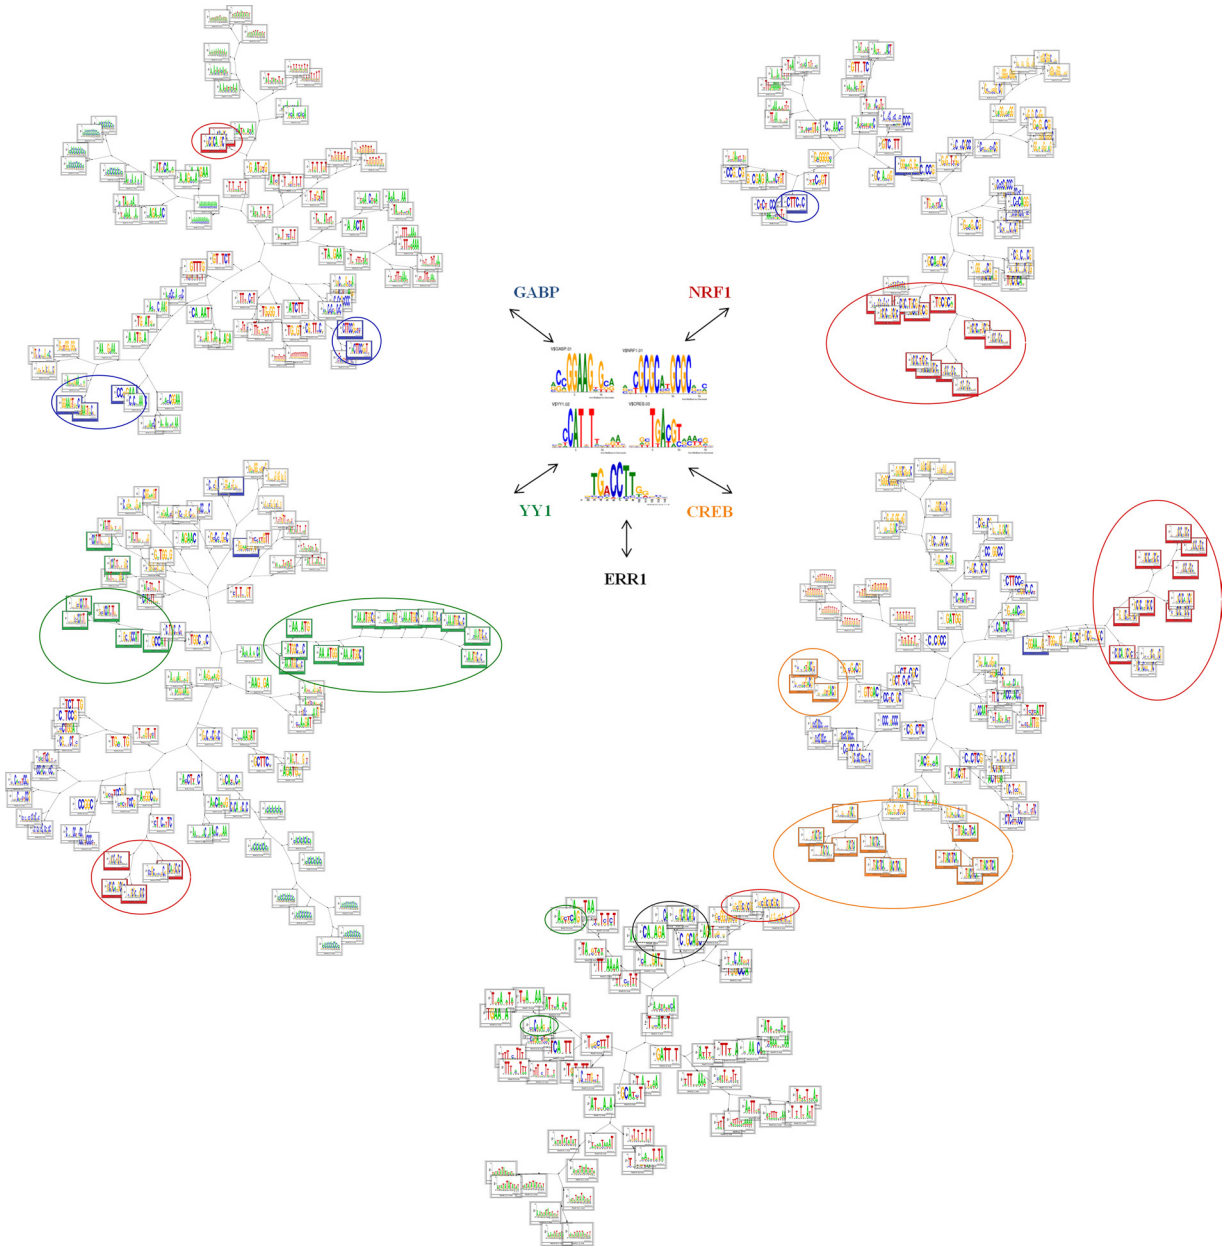

**Supplementary Figure 3: Motif discovery in positive ChIP-chip promoters for NRF1, GABP, CREB, ERR1 and YY1.** Colored circles represent the motifs discovered in gene promoters tested relative to *consensus* motif indicated in the center of the figure. Motifs discovered for other transcription factors than those explored by ChIP-chip are also shown by the corresponding color code. A high-resolution version of this figure is available on Oncotarget website.

| <b>PRC</b> |       |        |                |         |                                                           |
|------------|-------|--------|----------------|---------|-----------------------------------------------------------|
| GO.ID      | Total | Change | Enrichissement | P.Value | Term                                                      |
| 785        | 157   | 28     | 2.71           | 0       | <b>chromatin</b>                                          |
| 786        | 55    | 14     | 3.87           | 0       | nucleosome                                                |
| 1501       | 289   | 38     | 2.00           | 0       | skeletal system development                               |
| 1503       | 123   | 21     | 2.60           | 0       | ossification                                              |
| 1558       | 240   | 36     | 2.28           | 0       | blood vessel development                                  |
| 1565       | 79    | 16     | 3.08           | 0       | response to hypoxia                                       |
| 1944       | 244   | 37     | 2.31           | 0       | vasculature development                                   |
| 5694       | 388   | 47     | 1.84           | 0       | chromosome                                                |
| 6333       | 113   | 21     | 2.83           | 0       | <b>chromatin assembly or disassembly</b>                  |
| 6334       | 69    | 15     | 3.31           | 0       | nucleosome assembly                                       |
| 6793       | 1106  | 111    | 1.53           | 0       | phosphorus metabolic process                              |
| 6796       | 1106  | 111    | 1.53           | 0       | phosphate metabolic process                               |
| 6928       | 501   | 57     | 1.73           | 0       | cell motion                                               |
| 6215       | 979   | 99     | 1.54           | 0       | cell death                                                |
| 8283       | 945   | 100    | 1.61           | 0       | <b>cell proliferation</b>                                 |
| 8285       | 305   | 40     | 1.99           | 0       | negative regulation of cell proliferation                 |
| 9653       | 1036  | 106    | 1.56           | 0       | anatomical structure morphogenesis                        |
| 9888       | 604   | 69     | 1.74           | 0       | tissue development                                        |
| 9890       | 472   | 57     | 1.84           | 0       | negative regulation of biosynthetic process               |
| 9892       | 631   | 76     | 1.83           | 0       | negative regulation of metabolic process                  |
| 9967       | 245   | 34     | 2.10           | 0       | positive regulation of signal transduction                |
| 10558      | 454   | 55     | 1.84           | 0       | negative regulation of macromolecule biosynthetic process |
| 10605      | 595   | 69     | 1.76           | 0       | negative regulation of macromolecule metabolic process    |
| 10627      | 217   | 32     | 2.24           | 0       | regulation of protein kinase cascade                      |
| 10740      | 150   | 24     | 2.43           | 0       | positive regulation of protein kinase cascade             |
| 10926      | 922   | 109    | 1.80           | 0       | anatomical structure formation                            |
| 10941      | 657   | 70     | 1.62           | 0       | regulation of cell death                                  |
| 16265      | 983   | 99     | 1.53           | 0       | death                                                     |
| 16477      | 317   | 43     | 2.06           | 0       | cell migration                                            |
| 22607      | 668   | 76     | 1.73           | 0       | cellular component assembly                               |

| <b>NRF1</b> |       |        |                |         |                                                           |
|-------------|-------|--------|----------------|---------|-----------------------------------------------------------|
| GO.ID       | Total | Change | Enrichissement | P.Value | Term                                                      |
| 75          | 81    | 41     | 1.80           | 0       | <b>cell cycle checkpoint</b>                              |
| 226         | 127   | 61     | 1.71           | 0       | microtubule cytoskeleton organization                     |
| 278         | 422   | 178    | 1.50           | 0       | <b>mitotic cell cycle</b>                                 |
| 775         | 102   | 48     | 1.68           | 0       | chromosome, centromeric region                            |
| 785         | 157   | 76     | 1.73           | 0       | chromatin                                                 |
| 4842        | 126   | 69     | 1.95           | 0       | <b>ubiquitin-protein ligase activity</b>                  |
| 5635        | 175   | 90     | 1.63           | 0       | nuclear envelope                                          |
| 5643        | 69    | 35     | 1.84           | 0       | nuclear pore                                              |
| 5694        | 388   | 180    | 1.65           | 0       | chromosome                                                |
| 5759        | 208   | 95     | 1.63           | 0       | <b>mitochondrial matrix</b>                               |
| 5819        | 111   | 56     | 1.80           | 0       | spindle                                                   |
| 6091        | 301   | 129    | 1.53           | 0       | generation of precursor metabolites and energy            |
| 6119        | 84    | 41     | 1.74           | 0       | <b>oxidative phosphorylation</b>                          |
| 6260        | 207   | 88     | 1.52           | 0       | DNA replication                                           |
| 6325        | 344   | 149    | 1.54           | 0       | chromatin organization                                    |
| 6333        | 113   | 58     | 1.83           | 0       | chromatin assembly or disassembly                         |
| 6396        | 505   | 219    | 1.55           | 0       | RNA processing                                            |
| 6399        | 105   | 53     | 1.80           | 0       | tRNA metabolic process                                    |
| 6412        | 370   | 158    | 1.52           | 0       | translation                                               |
| 6457        | 154   | 71     | 1.64           | 0       | protein folding                                           |
| 6511        | 212   | 93     | 1.56           | 0       | <b>ubiquitin-dependent protein catabolic process</b>      |
| 6886        | 411   | 178    | 1.54           | 0       | intracellular protein transport                           |
| 6916        | 193   | 84     | 1.55           | 0       | anti-apoptosis                                            |
| 7005        | 106   | 51     | 1.72           | 0       | mitochondrion organization                                |
| 7093        | 49    | 28     | 2.04           | 0       | <b>mitotic cell cycle checkpoint</b>                      |
| 8380        | 274   | 116    | 1.51           | 0       | RNA splicing                                              |
| 10608       | 177   | 75     | 1.51           | 0       | <b>posttranscriptional regulation of gene expression</b>  |
| 15630       | 456   | 193    | 1.51           | 0       | microtubule cytoskeleton                                  |
| 16538       | 15    | 12     | 2.85           | 0       | <b>cyclin-dependent protein kinase regulator activity</b> |
| 16567       | 117   | 64     | 1.95           | 0       | <b>protein ubiquitination</b>                             |

| <b>CREB</b> |       |        |                |         |                                                 |
|-------------|-------|--------|----------------|---------|-------------------------------------------------|
| GO.ID       | Total | Change | Enrichissement | P.Value | Term                                            |
| 75          | 81    | 45     | 1.74           | 0       | <b>cell cycle checkpoint</b>                    |
| 87          | 238   | 129    | 1.70           | 0       | <b>M phase of mitotic cell cycle</b>            |
| 151         | 77    | 45     | 1.84           | 0       | <b>ubiquitin ligase complex</b>                 |
| 226         | 127   | 65     | 1.61           | 0       | microtubule cytoskeleton organization           |
| 278         | 422   | 221    | 1.64           | 0       | <b>mitotic cell cycle</b>                       |
| 279         | 334   | 169    | 1.59           | 0       | <b>M phase</b>                                  |
| 280         | 236   | 128    | 1.70           | 0       | <b>nuclear division</b>                         |
| 502         | 46    | 28     | 1.91           | 0       | <b>proteasome complex</b>                       |
| 775         | 102   | 65     | 2.00           | 0       | <b>chromosome, centromeric region</b>           |
| 776         | 61    | 42     | 2.16           | 0       | <b>kinetochore</b>                              |
| 777         | 42    | 29     | 2.17           | 0       | <b>condensed chromosome kinetochore</b>         |
| 779         | 46    | 30     | 2.05           | 0       | <b>condensed chromosome, centromeric region</b> |
| 785         | 157   | 85     | 1.70           | 0       | <b>chromatin</b>                                |
| 793         | 98    | 55     | 1.76           | 0       | <b>condensed chromosome</b>                     |
| 910         | 35    | 23     | 2.06           | 0       | single-stranded DNA binding                     |
| 3697        | 55    | 35     | 2.00           | 0       | cytokinesis                                     |
| 3713        | 201   | 100    | 1.56           | 0       | transcription coactivator activity              |
| 3723        | 647   | 312    | 1.51           | 0       | RNA binding                                     |
| 3735        | 148   | 79     | 1.68           | 0       | structural constituent of ribosome              |
| 4298        | 19    | 15     | 2.48           | 0       | threonine-type endopeptidase activity           |
| 4386        | 125   | 69     | 1.73           | 0       | helicase activity                               |
| 4842        | 126   | 67     | 1.67           | 0       | <b>ubiquitin-protein ligase activity</b>        |
| 5635        | 175   | 100    | 1.79           | 0       | nuclear envelope                                |
| 5643        | 68    | 45     | 2.08           | 0       | nuclear pore                                    |
| 5654        | 753   | 360    | 1.50           | 0       | nucleoplasm                                     |
| 5657        | 34    | 24     | 2.22           | 0       | <b>replication fork</b>                         |
| 5681        | 129   | 70     | 1.70           | 0       | spliceosomal complex                            |
| 5694        | 388   | 214    | 1.73           | 0       | <b>chromosome</b>                               |
| 5759        | 208   | 100    | 1.51           | 0       | mitochondrial matrix                            |
| 6281        | 263   | 133    | 1.59           | 0       | <b>DNA repair</b>                               |

| <b>ERRa</b> |       |        |                |          |                                                                  |
|-------------|-------|--------|----------------|----------|------------------------------------------------------------------|
| GO.ID       | Total | Change | Enrichissement | P.Value  | Term                                                             |
| 785         | 157   | 42     | 2.15           | 0        | chromatin                                                        |
| 786         | 55    | 19     | 2.77           | 0        | nucleosome                                                       |
| 4725        | 92    | 27     | 2.35           | 0        | <b>protein tyrosine phosphatase activity</b>                     |
| 5925        | 93    | 26     | 2.24           | 0        | focal adhesion                                                   |
| 6333        | 113   | 33     | 2.34           | 0        | chromatin assembly or disassembly                                |
| 6357        | 607   | 116    | 1.53           | 0        | regulation of transcription from RNA polymerase II promoter      |
| 8134        | 468   | 89     | 1.53           | 0        | <b>transcription factor binding</b>                              |
| 8138        | 40    | 18     | 3.61           | 0        | <b>protein tyrosine/serine/threonine phosphatase activity</b>    |
| 9653        | 1036  | 198    | 1.53           | 0        | anatomical structure morphogenesis                               |
| 9790        | 434   | 83     | 1.53           | 0        | embryonic development                                            |
| 9986        | 253   | 56     | 1.78           | 0        | cell surface                                                     |
| 10628       | 464   | 89     | 1.52           | 0        | <b>positive regulation of gene expression</b>                    |
| 10926       | 922   | 177    | 1.54           | 0        | anatomical structure formation                                   |
| 16564       | 263   | 57     | 1.74           | 0        | <b>transcription repressor activity</b>                          |
| 17017       | 13    | 8      | 4.94           | 0        | <b>MAP kinase tyrosine/serine/threonine phosphatase activity</b> |
| 30055       | 100   | 28     | 2.25           | 0        | cell-substrate junction                                          |
| 32989       | 359   | 71     | 1.59           | 0        | cellular component morphogenesis                                 |
| 33549       | 13    | 8      | 4.94           | 0        | <b>MAP kinase phosphatase activity</b>                           |
| 43353       | 7     | 6      | 6.87           | 0        | enucleate erythrocyte differentiation                            |
| 44427       | 319   | 65     | 1.63           | 0        | chromosomal part                                                 |
| 45893       | 383   | 77     | 1.61           | 0        | <b>positive regulation of transcription, DNA-dependent</b>       |
| 48646       | 310   | 67     | 1.73           | 0        | anatomical structure formation involved in morphogenesis         |
| 51093       | 478   | 92     | 1.54           | 0        | negative regulation of developmental process                     |
| 51254       | 385   | 77     | 1.60           | 0        | <b>positive regulation of RNA metabolic process</b>              |
| 65003       | 501   | 94     | 1.50           | 0        | macromolecular complex assembly                                  |
| 902         | 328   | 65     | 1.59           | 1.00E-04 | cell morphogenesis                                               |
| 5694        | 388   | 75     | 1.55           | 1.00E-04 | chromosome                                                       |
| 5924        | 97    | 26     | 2.15           | 1.00E-04 | cell-substrate adherens junction                                 |
| 6605        | 217   | 47     | 1.74           | 1.00E-04 | protein targeting                                                |
| 6869        | 138   | 30     | 1.74           | 0.0015   | <b>lipid transport</b>                                           |

| <b>GABP</b> |       |        |                |         |                                                                                                |
|-------------|-------|--------|----------------|---------|------------------------------------------------------------------------------------------------|
| GO.ID       | Total | Change | Enrichissement | P.Value | Term                                                                                           |
| 375         | 152   | 48     | 2.04           | 0       | <b>RNA splicing, via transesterification reactions</b>                                         |
| 377         | 152   | 48     | 2.04           | 0       | <b>RNA splicing, via transesterification reactions with bulged adenosine as nucleophile</b>    |
| 398         | 152   | 48     | 2.04           | 0       | <b>nuclear mRNA splicing, via spliceosome</b>                                                  |
| 3723        | 647   | 155    | 1.55           | 0       | RNA binding                                                                                    |
| 3735        | 148   | 51     | 2.23           | 0       | structural constituent of ribosome                                                             |
| 5654        | 753   | 188    | 1.61           | 0       | nucleoplasm                                                                                    |
| 5657        | 34    | 16     | 3.04           | 0       | <b>replication fork</b>                                                                        |
| 5681        | 129   | 70     | 2.41           | 0       | <b>spliceosomal complex</b>                                                                    |
| 5730        | 643   | 174    | 1.75           | 0       | nucleolus                                                                                      |
| 5740        | 355   | 85     | 1.55           | 0       | <b>mitochondrial envelope</b>                                                                  |
| 5840        | 186   | 62     | 2.16           | 0       | ribosome                                                                                       |
| 6396        | 505   | 157    | 2.01           | 0       | RNA processing                                                                                 |
| 6397        | 301   | 95     | 2.04           | 0       | mRNA processing                                                                                |
| 6399        | 105   | 41     | 2.53           | 0       | tRNA metabolic process                                                                         |
| 6412        | 370   | 108    | 1.89           | 0       | translation                                                                                    |
| 6886        | 411   | 101    | 1.59           | 0       | <b>intracellular protein transport</b>                                                         |
| 8033        | 66    | 25     | 2.45           | 0       | tRNA processing                                                                                |
| 8380        | 274   | 91     | 2.15           | 0       | <b>RNA splicing</b>                                                                            |
| 16071       | 346   | 102    | 1.91           | 0       | mRNA metabolic process                                                                         |
| 22613       | 165   | 56     | 2.19           | 0       | <b>ribonucleoprotein complex biogenesis</b>                                                    |
| 22994       | 52    | 20     | 2.49           | 0       | <b>respiratory electron transport chain</b>                                                    |
| 36259       | 447   | 147    | 2.13           | 0       | <b>ribonucleoprotein complex</b>                                                               |
| 31145       | 63    | 23     | 2.36           | 0       | anaphase-promoting complex-dependent proteasomal ubiquitin-dependent protein catabolic process |
| 31966       | 335   | 80     | 1.54           | 0       | <b>mitochondrial membrane</b>                                                                  |
| 31974       | 1637  | 400    | 1.58           | 0       | membrane-enclosed lumen                                                                        |
| 31981       | 1286  | 327    | 1.64           | 0       | nuclear lumen                                                                                  |
| 33279       | 118   | 39     | 2.14           | 0       | <b>ribosomal subunit</b>                                                                       |
| 34470       | 164   | 54     | 2.13           | 0       | <b>ncRNA processing</b>                                                                        |
| 34613       | 441   | 107    | 1.57           | 0       | cellular protein localization                                                                  |
| 34660       | 204   | 71     | 2.25           | 0       | ncRNA metabolic process                                                                        |

| <b>Y11</b> |       |        |                |          |                                                                                      |
|------------|-------|--------|----------------|----------|--------------------------------------------------------------------------------------|
| GO.ID      | Total | Change | Enrichissement | P.Value  | Term                                                                                 |
| 313        | 49    | 14     | 5.40           | 0        | <b>organellar ribosome</b>                                                           |
| 314        | 19    | 7      | 6.96           | 0        | <b>organellar small ribosomal subunit</b>                                            |
| 375        | 152   | 27     | 3.35           | 0        | RNA splicing, via transesterification reactions                                      |
| 377        | 152   | 27     | 3.35           | 0        | RNA splicing, via transesterification reactions with bulged adenosine as nucleophile |
| 398        | 152   | 27     | 3.35           | 0        | nuclear mRNA splicing, via spliceosome                                               |
| 3723       | 647   | 83     | 2.42           | 0        | RNA binding                                                                          |
| 3735       | 148   | 29     | 3.70           | 0        | structural constituent of ribosome                                                   |
| 5739       | 966   | 94     | 1.84           | 0        | mitochondrion                                                                        |
| 5759       | 208   | 31     | 2.81           | 0        | mitochondrial matrix                                                                 |
| 5761       | 49    | 14     | 5.40           | 0        | mitochondrial ribosome                                                               |
| 5763       | 19    | 7      | 6.96           | 0        | mitochondrial small ribosomal subunit                                                |
| 5840       | 186   | 34     | 3.45           | 0        | ribosome                                                                             |
| 6396       | 505   | 72     | 2.69           | 0        | RNA processing                                                                       |
| 6397       | 301   | 45     | 2.82           | 0        | mRNA processing                                                                      |
| 6412       | 370   | 61     | 3.11           | 0        | translation                                                                          |
| 8380       | 274   | 42     | 2.89           | 0        | RNA splicing                                                                         |
| 10467      | 3247  | 280    | 1.63           | 0        | gene expression                                                                      |
| 16070      | 2157  | 180    | 1.58           | 0        | <b>RNA metabolic process</b>                                                         |
| 16071      | 346   | 48     | 2.62           | 0        | <b>mRNA metabolic process</b>                                                        |
| 16607      | 93    | 19     | 3.86           | 0        | nuclear speck                                                                        |
| 30529      | 447   | 61     | 2.58           | 0        | ribonucleoprotein complex                                                            |
| 31974      | 1637  | 136    | 1.57           | 0        | membrane-enclosed lumen                                                              |
| 31980      | 208   | 31     | 2.81           | 0        | <b>mitochondrial lumen</b>                                                           |
| 32991      | 2342  | 194    | 1.56           | 0        | macromolecular complex                                                               |
| 33279      | 118   | 20     | 3.20           | 0        | <b>ribosomal subunit</b>                                                             |
| 34660      | 204   | 29     | 2.59           | 0        | <b>ncRNA metabolic process</b>                                                       |
| 43233      | 1607  | 135    | 1.59           | 0        | organellar lumen                                                                     |
| 44267      | 2254  | 193    | 1.55           | 0        | cellular protein metabolic process                                                   |
| 44429      | 518   | 58     | 2.11           | 0        | mitochondrial part                                                                   |
| 42773      | 45    | 10     | 4.20           | 1.00E-04 | <b>ATP synthesis coupled electron transport</b>                                      |

Supplementary Figure 4: For each transcription factor and PRC coactivator most representative gene ontologies (n=30) for positive genes on ChIP-chip were determined using GOMiner software.

**Supplementary Table 1: Primers used for quantitative RT-PCR analysis**

---

|                 |                                                                         |
|-----------------|-------------------------------------------------------------------------|
| CYCS            | For: 5'-CCAGTGCCACACCGTTGAA-3' Rev: 5'-TCCCCAGATGATGCCTTTGTT-3';        |
| CITED2          | For: 5'-GCGAAGGAGGATGCCAACC-3' Rev: 5'-CAGCTGCATACTAGCCAGCA-3'          |
| COX18           | For: 5'-CATCAGCACCACTTCACGAA-3' Rev: 5'-CCACCAACTGTCAGAAGCAT-3'         |
| CAMK2A          | For: 5'-TACGGCGACGAGAAGCTGAG-3' Rev: 5'-AGACACCAGGAGGTGCCTTG-3'         |
| COX4I2          | For: 5'-GGTGAAGACGAGGGATGCA-3' Rev: 5'-CAGCTGGGTCCAGCTTCCCT-3'          |
| HIF1            | For: 5'-AGGAGCTGAGTTGGAATAGTG-3' Rev: 5'-CCAGCTATCTTACTAGTGGGTG-3'      |
| NDUFC1          | For: 5'-GCCGTCTGGTTACTGTAATC-3' Rev: 5'-GGTTACTCAGTGTTCATCTTG-3'        |
| POLG2           | For: 5'-CAACGGAGGTGAGCGTGC-3' Rev: 5'-GAGGTGTATATAGAAGGTGAT-3'          |
| UCP2            | For: 5'-CATTCTGACCATGGTGCCTACTGA-3' Rev: 5'-GTTCATGTATCTCGTCTTGACCAC-3' |
| UQCR            | For: 5'-CTTCCTGGGCCACGCTACC-3' Rev: 5'-GTCCAGGATCAGCCGCCAAT-3'          |
| $\beta$ -globin | For: 5'-CAACTTCATCCACGTTCCACC-3' Rev: 5'-ACACAACCTGTGTTCACTAG-3'        |

---
